# Supplementary material for: Sea-ice arches structure Arctic primary production hotspots at the Last Ice Area gateway
Source: Research Square preprint supplement (doi:10.21203/rs.3.rs-7827911/v1), 2025-10-28

Supplementary Material for Sea-ice arches structure Arctic primary production hotspots at the Last Ice Area gateway:

**Cloudiness Analysis**

An important challenge of ocean color observations in Polar regions is the data availability. As the sea-ice extent decreases, moisture and cloudiness increase in the Arctic, reducing the PP. (Bélanger et al., 2013). The distribution of the cloud cover both spatially and temporally can influence interannual changes in Chl and PP observations. We looked at both spring and summer, respectively from April to June and from July to September, to assess the influence of cloud coverage on open water data availability. The open water fraction was estimated using passive microwave data that are not influenced by clouds. Years in which the percentage of pixels available was less than 50% of the total pixels available for ice-free waters were available for both seasons were excluded from the study (see S1). This excluded the years 2004 and 2014, as these were the only years in which this occurred for both seasons. A more extensive study has been conducted on the cloud fraction for ice-free pixels with no PP values (see S2). We compared the year 2007 (S2a,c), 2008 (S2b,d) with the two years that were discarded: 2004 (S2e,g) and 2014 (S2f,h). We can observe that the cloud fraction is denser and cover the most productive months (July and August) in the two years that were discarded from the study.

**Trends analysis**:

We used the same methodology as in Bélanger (2013) using Theil-Sen approach which is less sensitive to outliers with the non-parametric Man-Kendall test to verify the significance of the trend (S3, S4, S6)

***K*-means clustering**:

The *k*-means clustering algorithm used is available on the Sentinel Application Platform (SNAP, <https://earth.esa.int/eogateway/tools/snap>). The default parameters were applied (random seed = 31415, number of iterations = 30), and the numbers of clusters tested ranged from 2 to 11 (S5).  To avoid latitude constraint on the southern cluster present in the original subset, the study area was extended before applying the clustering. Clustering was performed on this larger per-pixel maximum climatology subset, and a median filter 7 x 7 was applied to remove extreme values.

Fig. S1 (below). Available pixels (%) for open water pixels. Both spring (April-June) and summer (July-September) have been represented. The 50% threshold is represented and used to exclude years with a value below this threshold in both seasons.

 
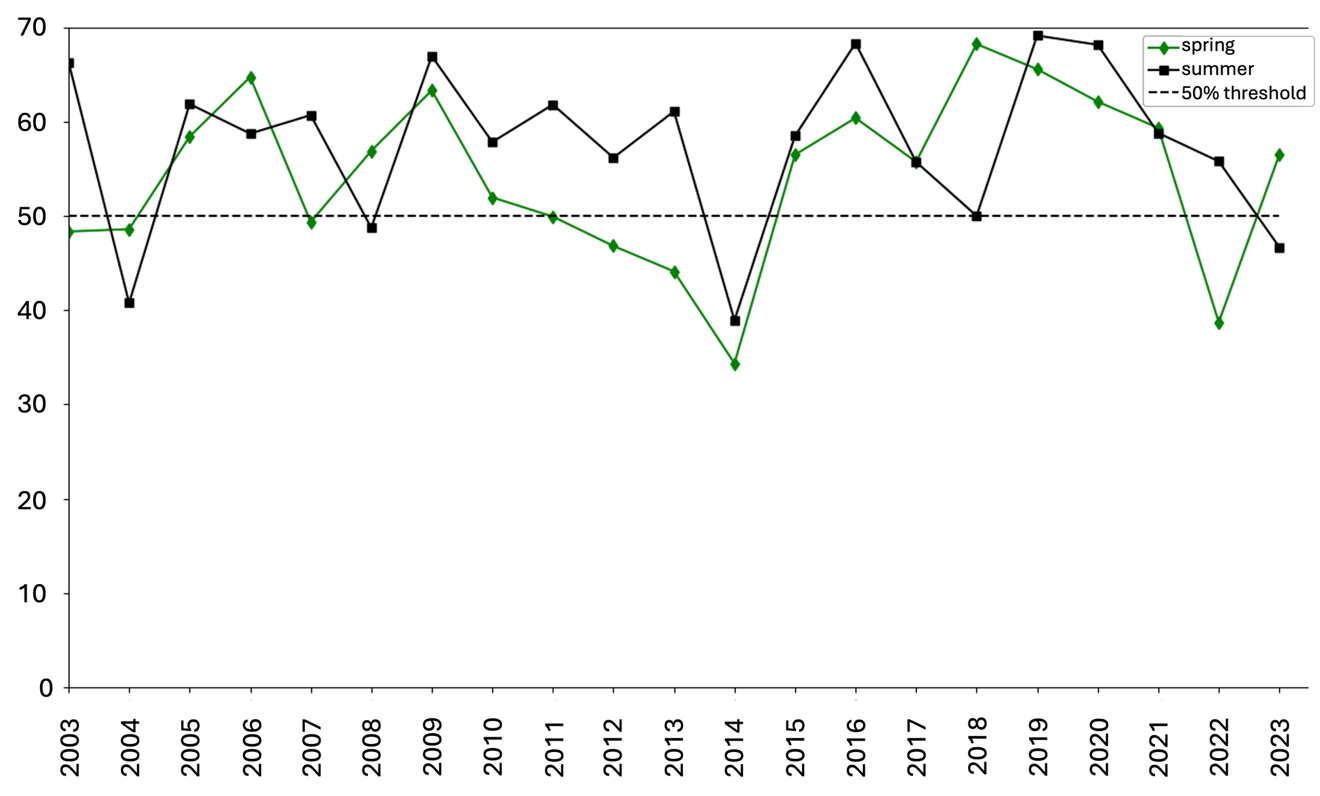


Fig. S2 (below). Daily percentage of ice-free pixels with no PP values (a,b,e,f) with the Cloud Fraction (colorscale) for each ice-free pixel. Proportion of pixels that are ice-covered (orange), with PP data (blue) and open water but no PP data (green). The x-axis shows months of the year. Panels correspond to different years: a, c = 2007; b, d = 2008; e, g = 2004; f, h = 2014.


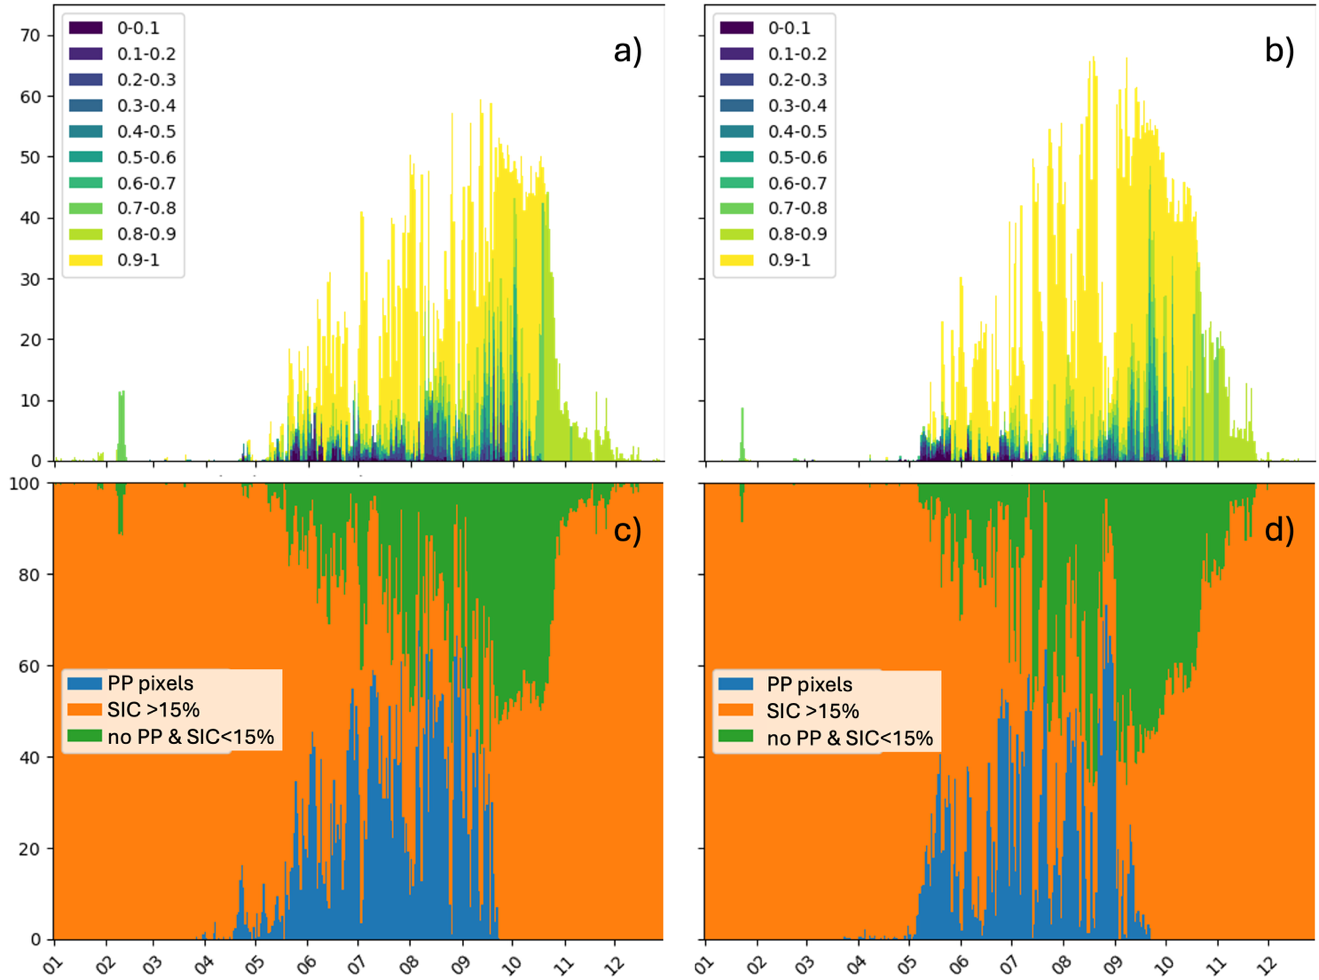

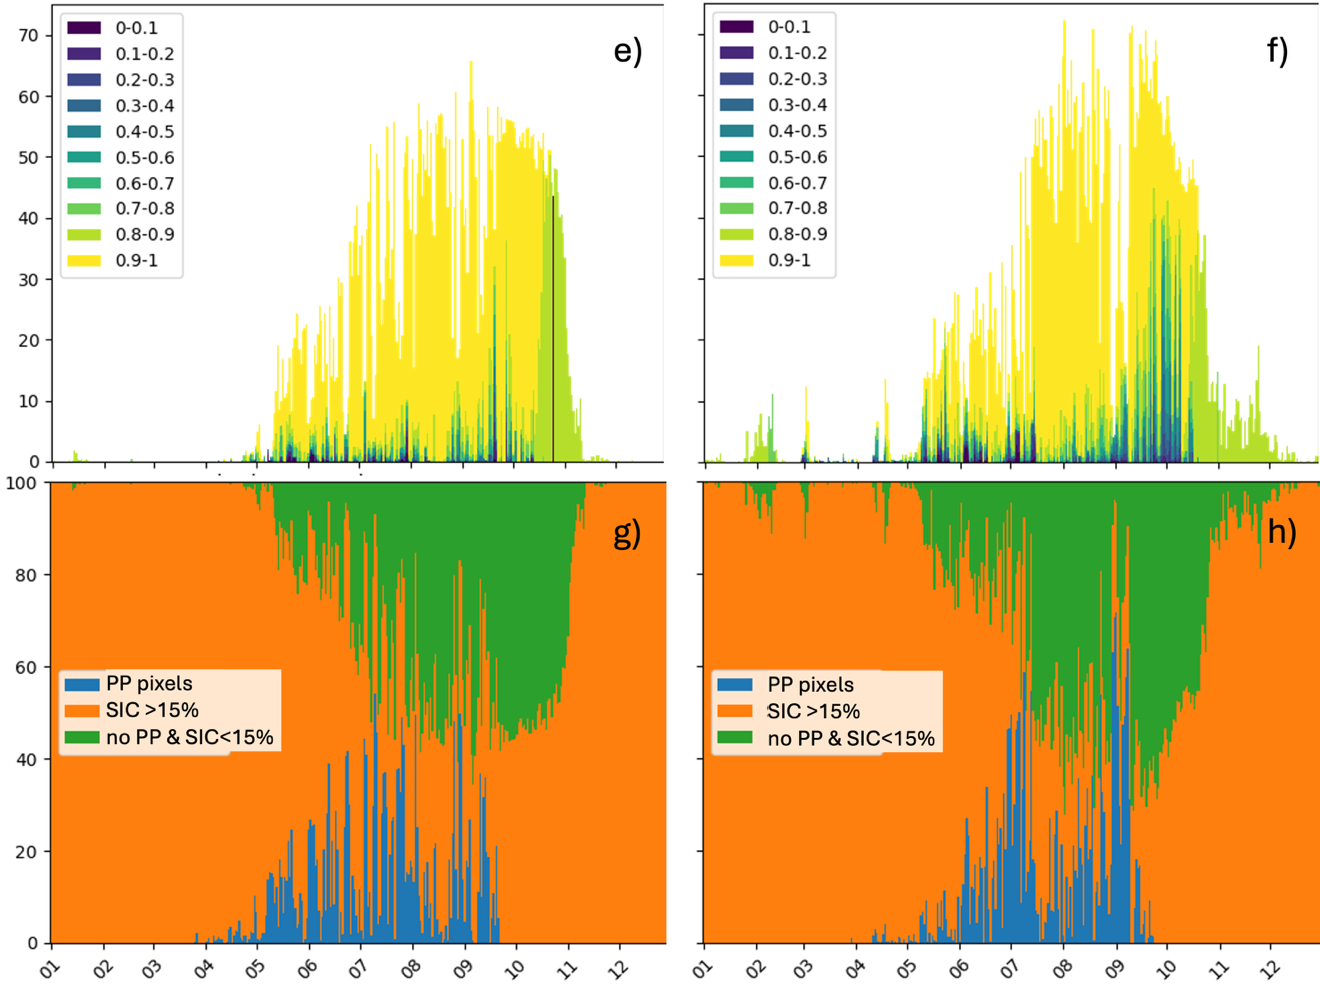


Fig. S3 (below). Annual PP (TgC y-1) of the Southern Hotspot with the original Blais (2017) timeseries in orange and the long time series of this study in blue teal.


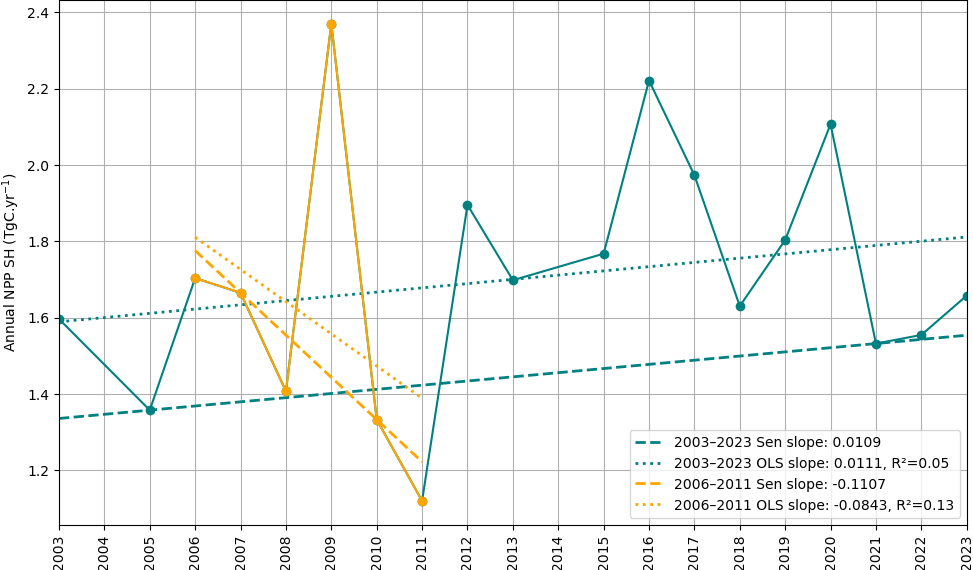


Fig. S4 (below). Annual PP (TgC y-1) from 2003 to 2023 and the corresponding Sen slope. Years 2004 and 2014 were not included in the slope estimation (Sen’s slope = 0.0138, τ = 0.135, *p* = 0.441).


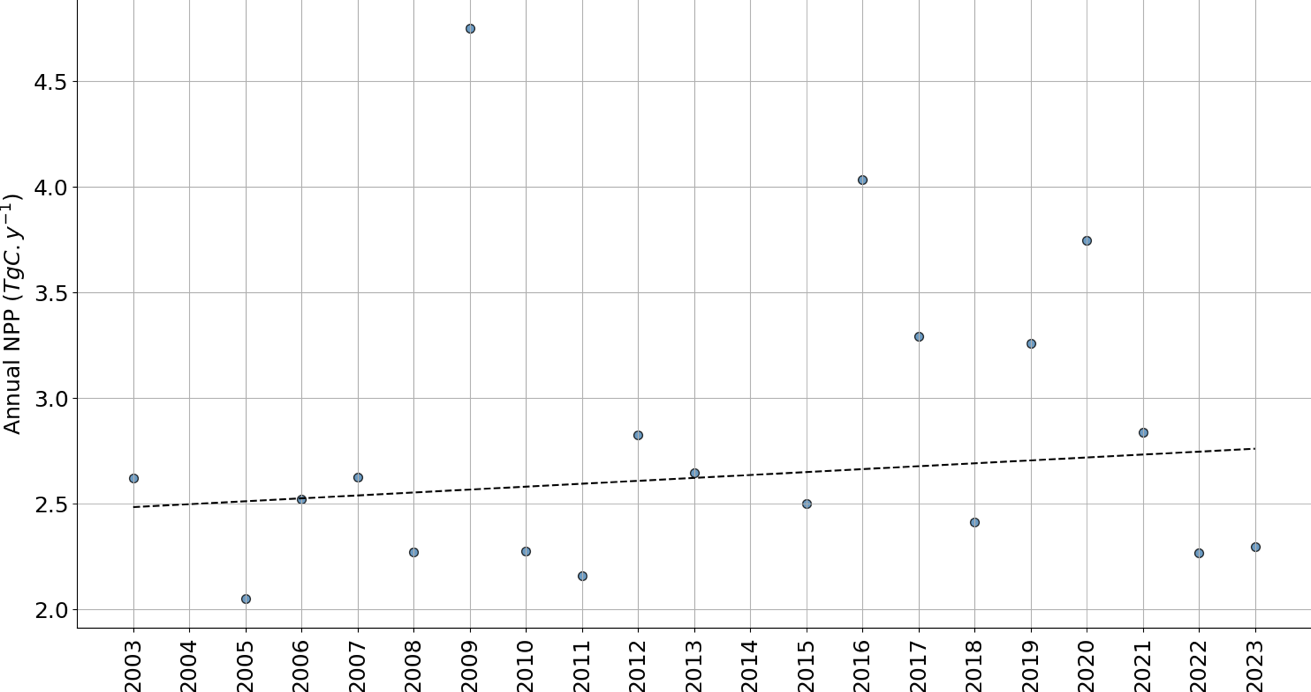


Fig. S5 (below): *K*-means clustering analytical maps for *k* = 2 to 11 using SNAP toolbox and default parameters.


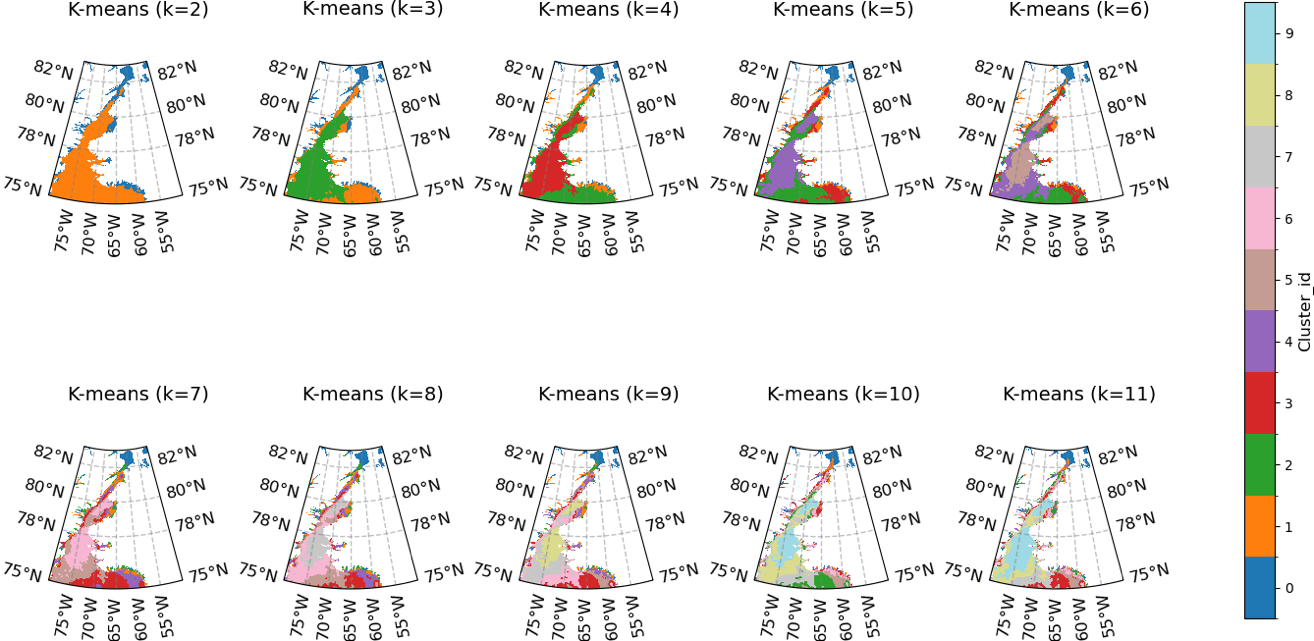


Fig. S6 (below): Changes in the timing of the break-up (filled circle; Sen’s slope = -0.519 d y-1, Kendall’s τ = -0.177, *p* = 0.263) and freeze-up (open circle; Sen’s slope = 0.345 d y-1, Kendall’s τ = 0.163, *p* = 0.304) of the open water period (ice fraction less than 0.35 for a 21 consecutive days).


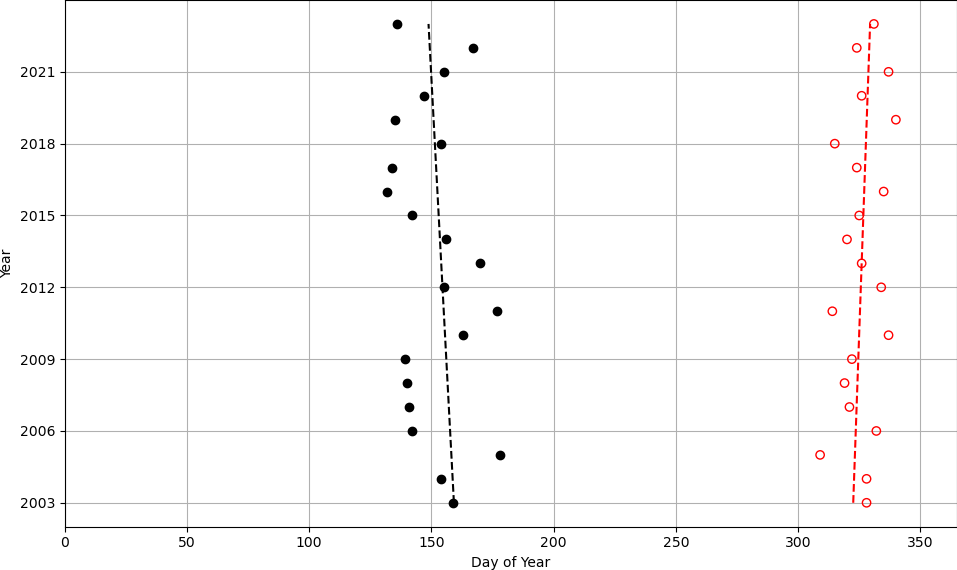

Supplement: Supplementary file 1 [file af4cf5e67f0035b6e4981e52.docx]
